# Supplementary material for: Zebrafish airinemes optimize their shape between ballistic and diffusive search
Source: eLife. 2022 Apr 25;11:e75690. doi: 10.7554/eLife.75690 (PMC9098217; doi:10.7554/eLife.75690)
Supplement: Figure 2—source data 1. [file elife-75690-fig2-data1.xlsx]

## Sheet: Sheet1
Test for isotropy in final angles
v	4.5	velocity (um/min)
lp	12.24	persistence length (um)
Name	ds (um)	tau (min)	KSStat	N	pvalue
3lp	36.72	8.16	0.1509	49	0.145
4lp	48.96	10.88	0.1174	41	0.4707
5lp	61.2	13.6	0.1162	30	0.6377
10min	45	10	0.131	43	0.3237
15min	67.5	15	0.1573	26	0.3692
20min	90	20	0.1986	16	0.356
25min	112.5	25	0.3861	7	too few data points
30min	135	30	0.4254	2	too few data points
