# Supplementary figures and images for: Zebrafish airinemes optimize their shape between ballistic and diffusive search
Source: eLife journal article supplement (doi:10.7554/elife.75690), 2022-04-25

**A**

Attempts to hit target cell

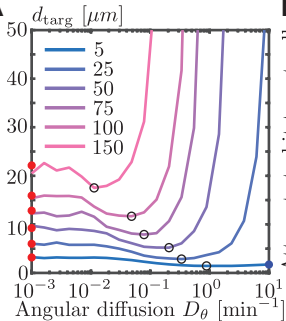**B**

Attempts to hit target cell

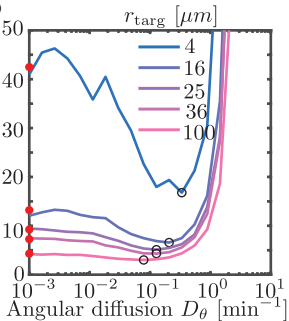

Supplement: supp [file elife-75690-supp-v1.zip]

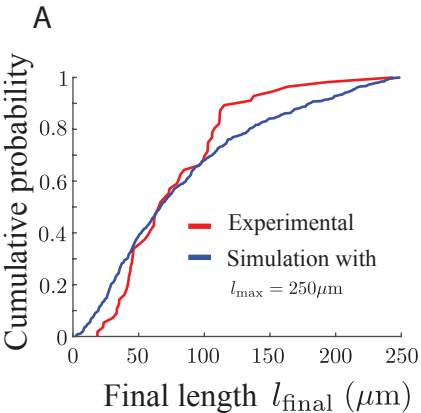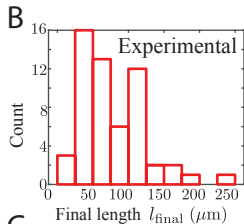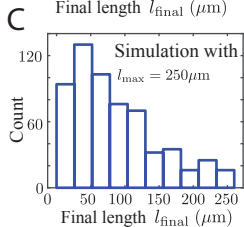

Supplement: supp [file elife-75690-supp-v1.zip]

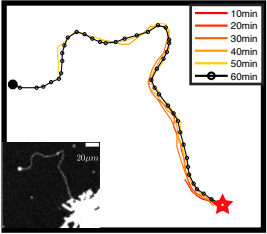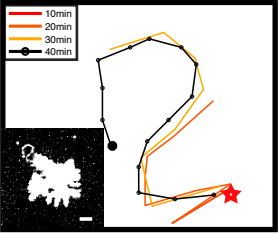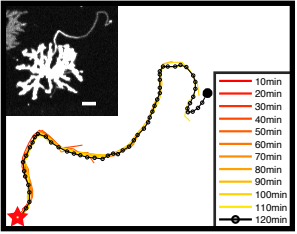

Supplement: supp [file elife-75690-supp-v1.zip]

# Experimental Data

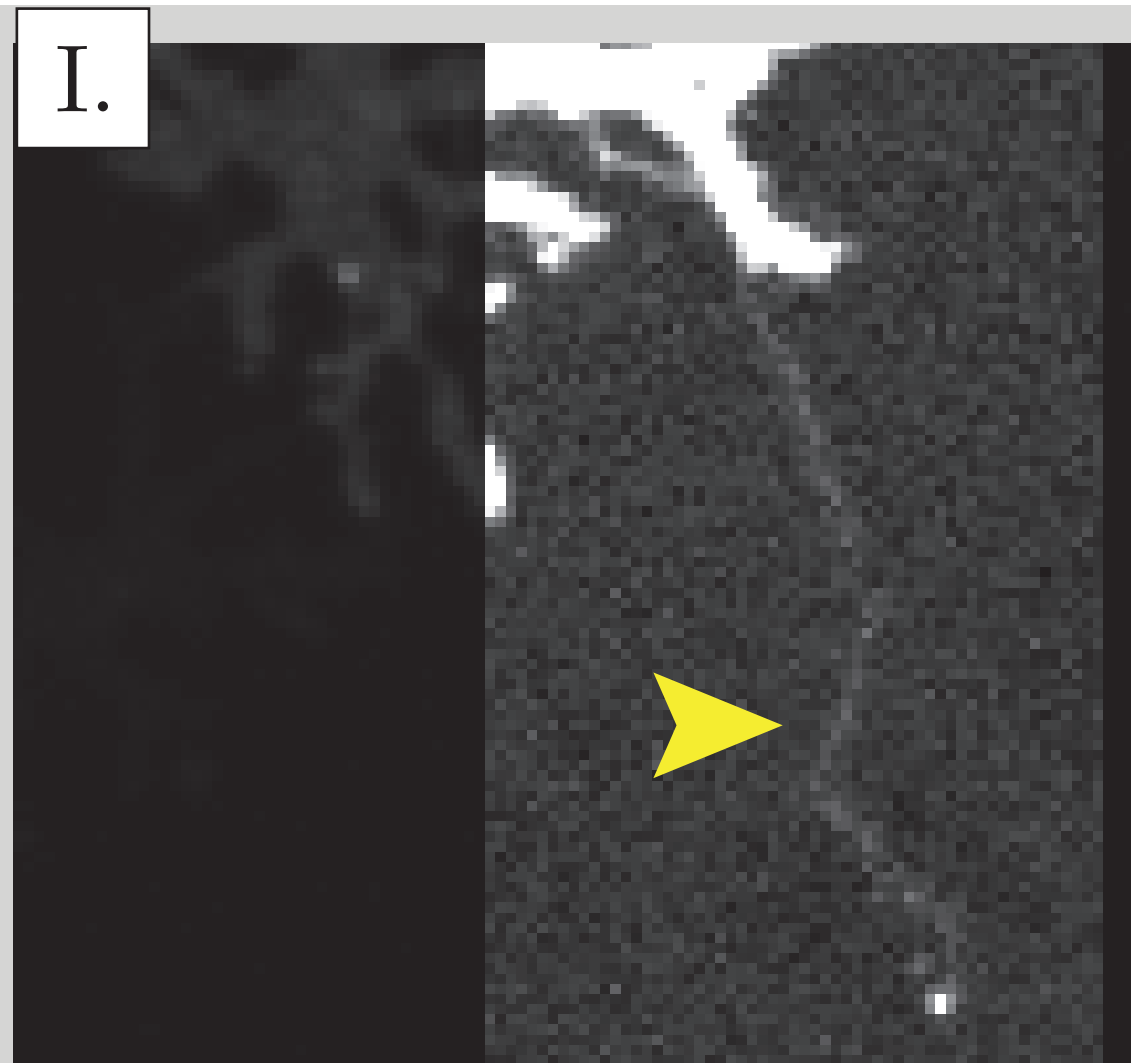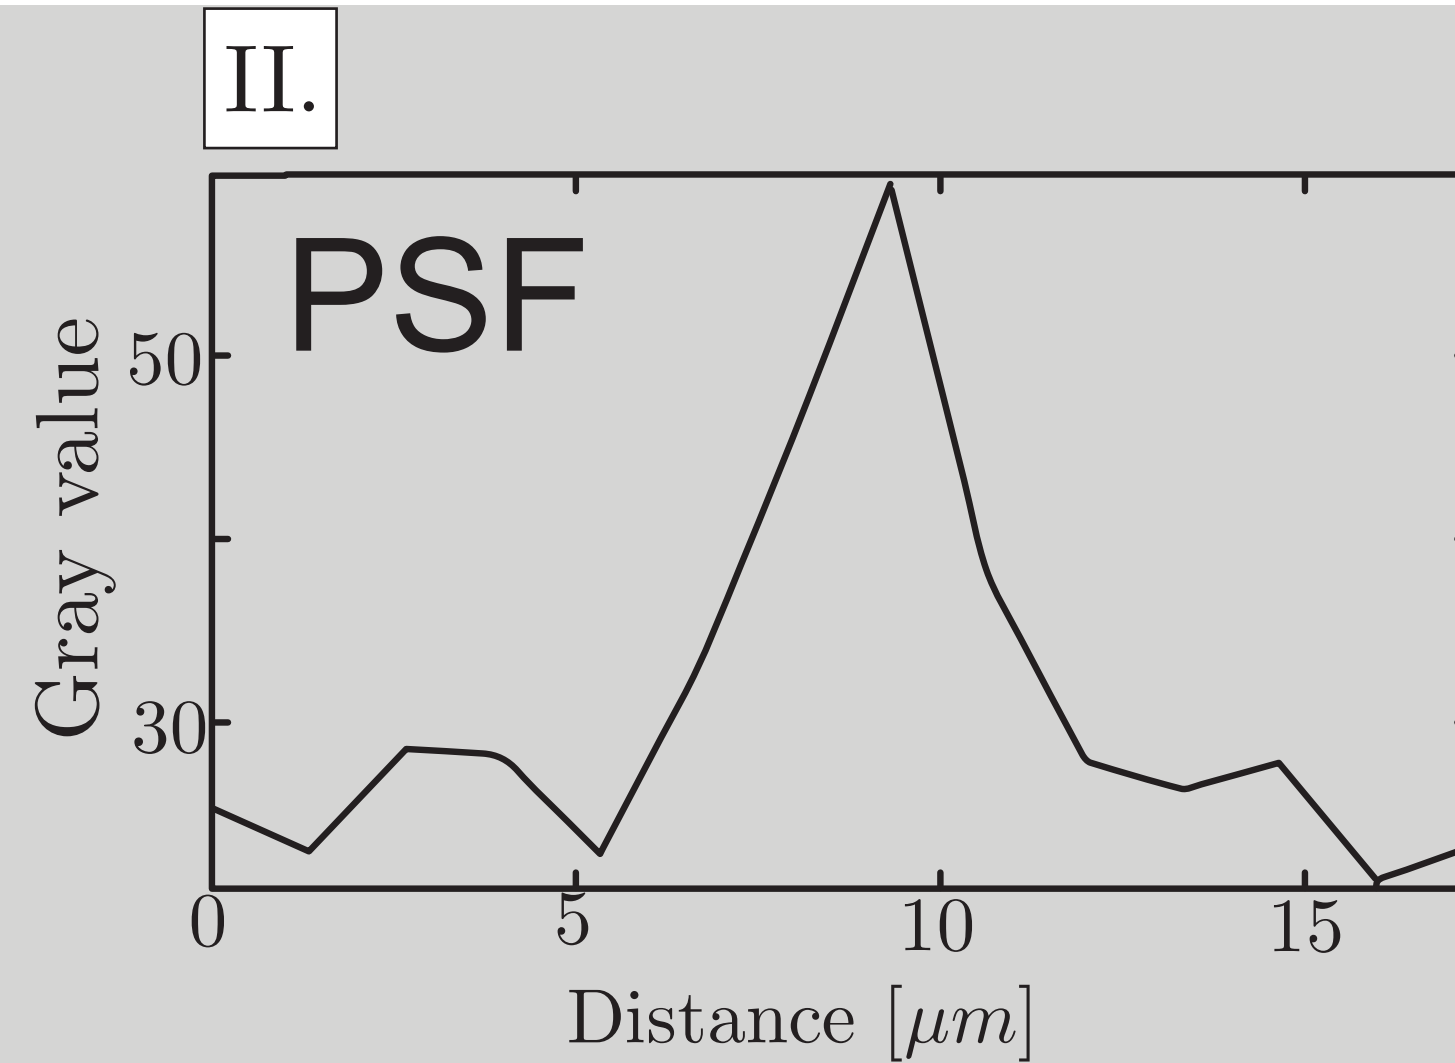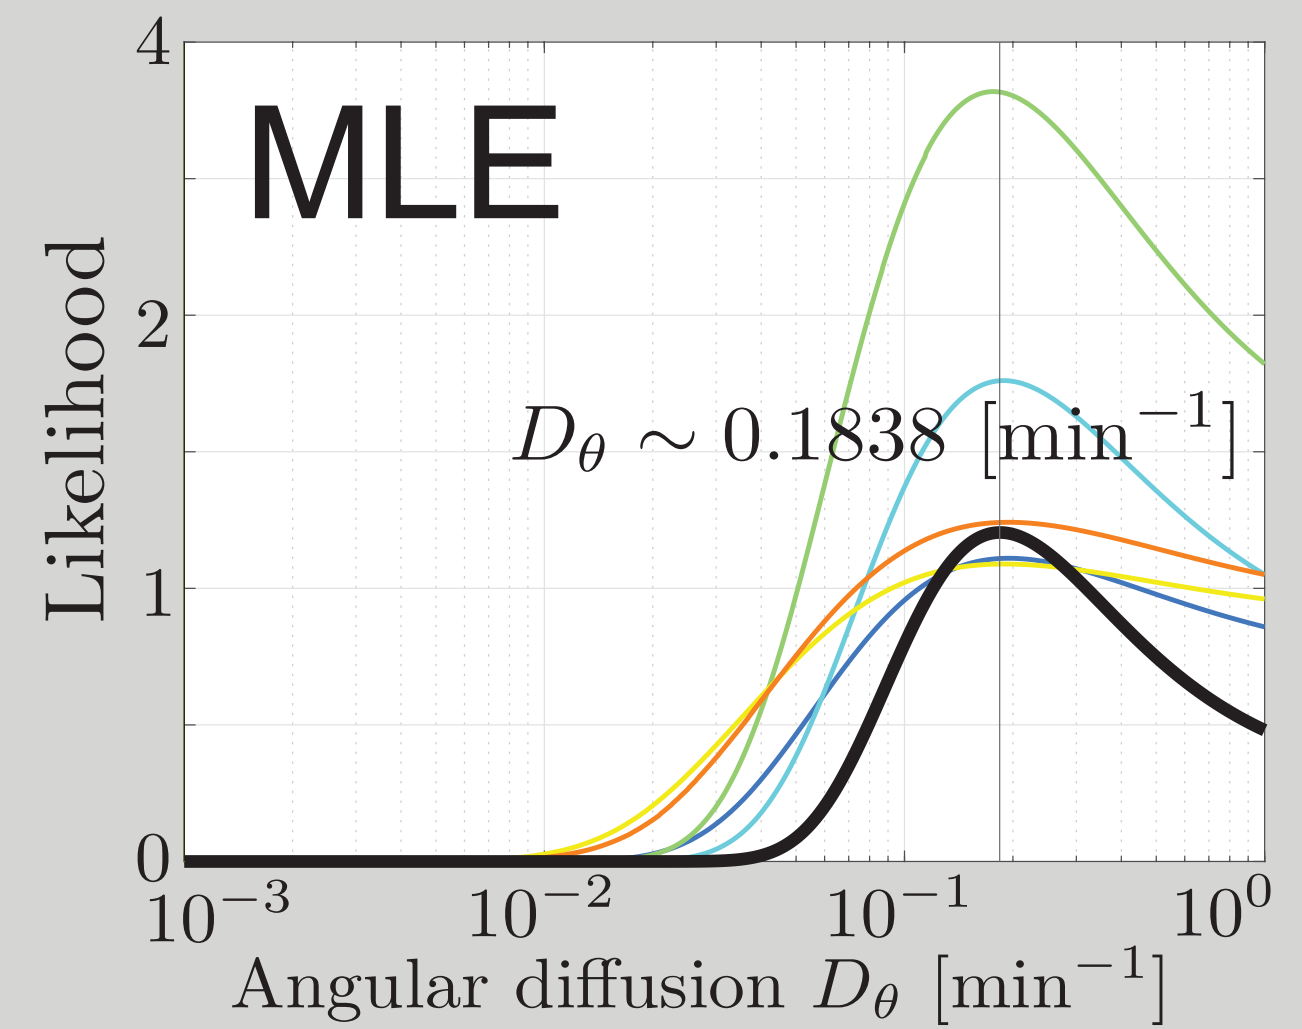

# Method Validation (Simulated Data)

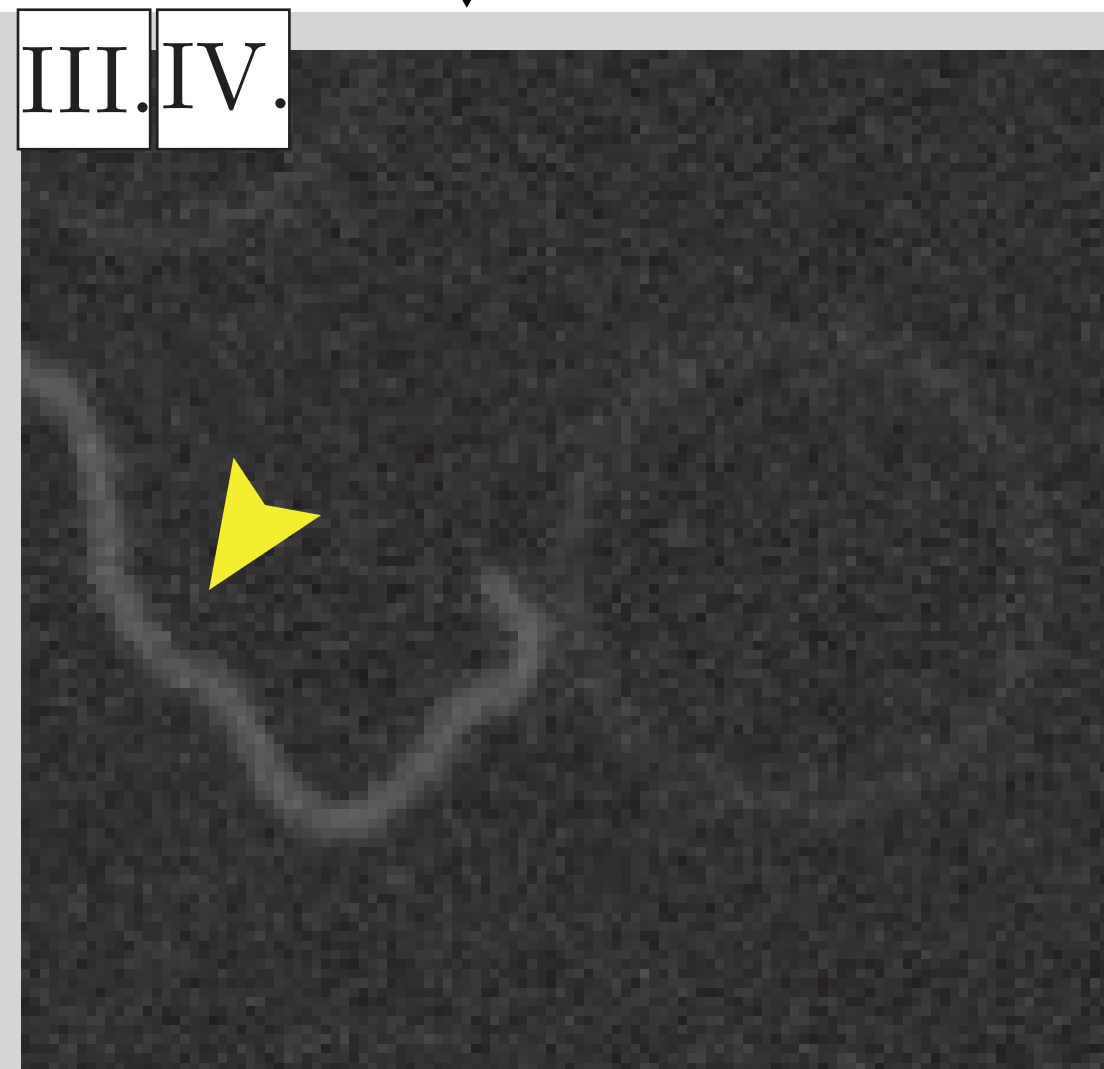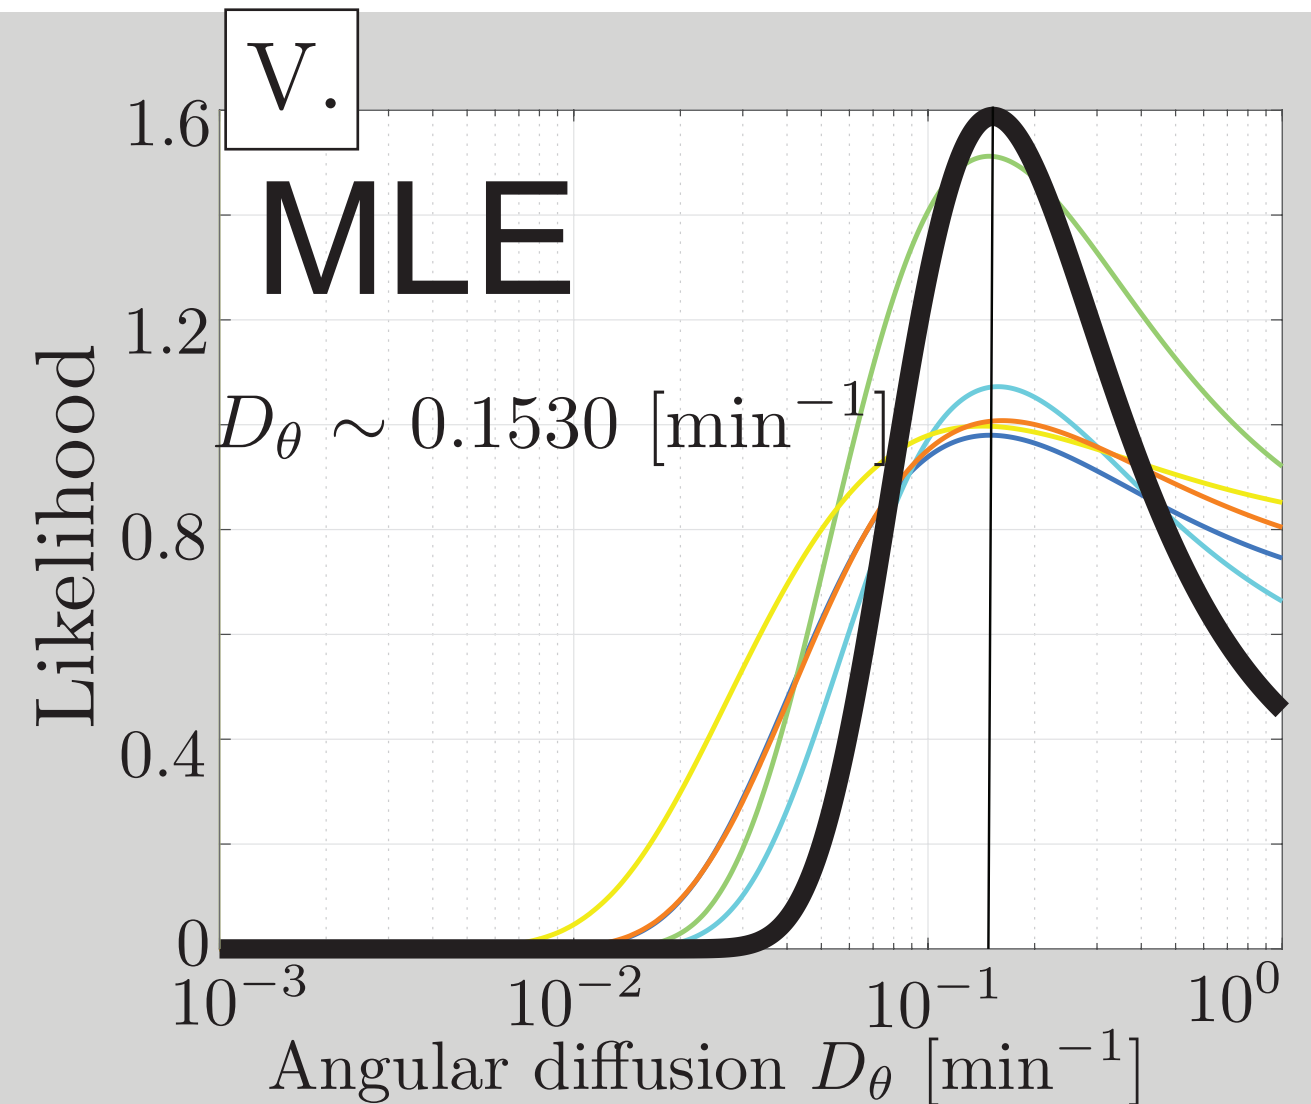

Supplement: supp [file elife-75690-supp-v1.zip]

# A Experimental Data

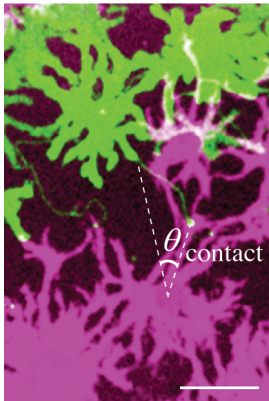

# B

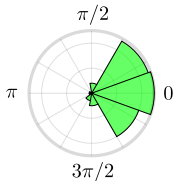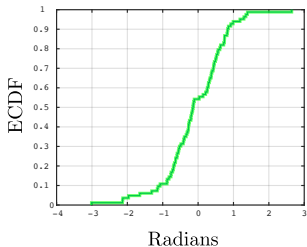

Supplement: supp [file elife-75690-supp-v1.zip]

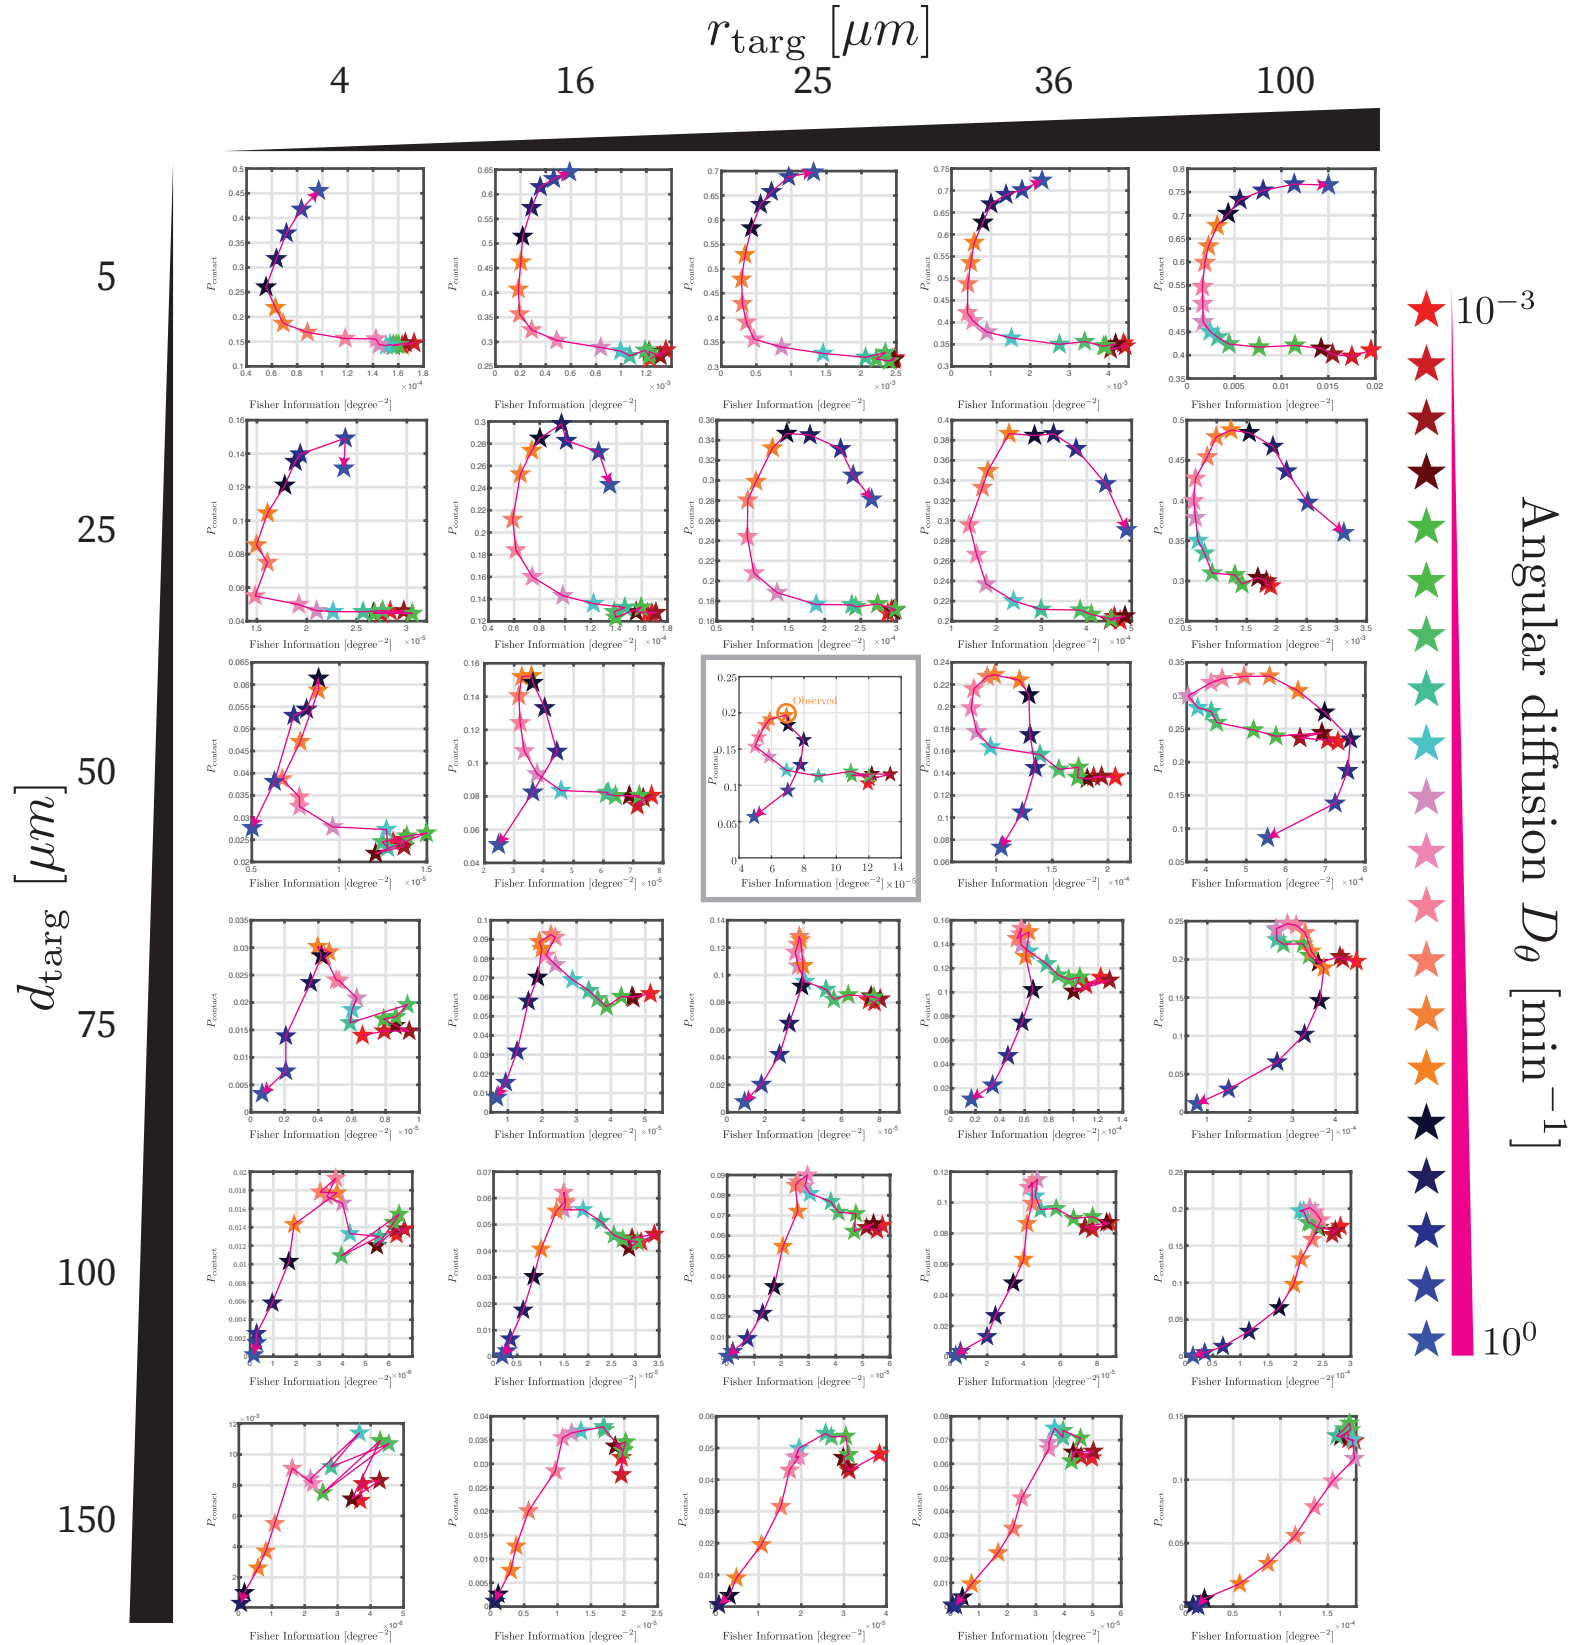

Supplement: supp [file elife-75690-supp-v1.zip]
